# Supplementary material for: Neural stem cells secrete factors facilitating brain regeneration upon constitutive Raf-Erk activation
Source: PubMed Central journal article supplement (PMC4995508; doi:10.1038/srep32025), 2016-08-24
Supplement: srep32025-s1.pdf [file srep32025-s1.pdf]

1 **Supplementary data**

2  
3 **Neural stem cells secrete factors facilitating brain regeneration upon constitutive**  
4 **Raf-Erk activation**

5  
6 (Running title: Therapeutic use of Raf-Erk activation in NSCs)

7  
8  
9 Yong-Hee Rhee<sup>1,2,8</sup>, Sang-Hoon Yi<sup>1,2,8</sup>, Joo Yeon Kim<sup>3</sup>, Mi-Yoon Chang<sup>1,2</sup>, A-Young Jo<sup>1,2</sup>, Jinyoung  
10 Kim<sup>1,2</sup>, Chang-Hwan Park<sup>2,5</sup>, Je-Yoel Cho<sup>6</sup>, Young-Jin Choi<sup>7</sup>, Woong Sun<sup>3</sup>, Sang-Hun Lee<sup>1,2,5,8</sup>

11  
12  
13 <sup>1</sup>Department of Biochemistry and Molecular Biology, College of Medicine, Hanyang University,  
14 Seoul, Korea

15 <sup>2</sup>Hanyang Biomedical Research Institute, Hanyang University, Seoul, Korea

16 <sup>3</sup>Department of Anatomy, College of Medicine, Korea University, Seoul, Korea

17 <sup>4</sup>Department of Microbiology, College of Medicine, Hanyang University, Seoul, Korea

18 <sup>5</sup>Graduate School of Biomedical Science and Engineering, Hanyang University, Seoul, Korea

19 <sup>6</sup>Department of Biochemistry, BK21 PLUS Program for Creative Veterinary Science Research and  
20 Research Institute for Veterinary Science, College of Veterinary Medicine, Seoul National  
21 University, Seoul, South Korea

22 <sup>7</sup>ProtAnBio, Co., Seoul, South Korea

23 <sup>8</sup>Co-first author

24  
25  
26 **§Author for correspondence**

27 Department of Biochemistry and Molecular Biology

28 College of Medicine, Hanyang University

29 Seoul, KOREA

30 Phone: 82-2-2220-0625

31 Email: [leesh@hanyang.ac.kr](mailto:leesh@hanyang.ac.kr)

1 **Supplementary Figures and legends**

2

3 **Figure S1**

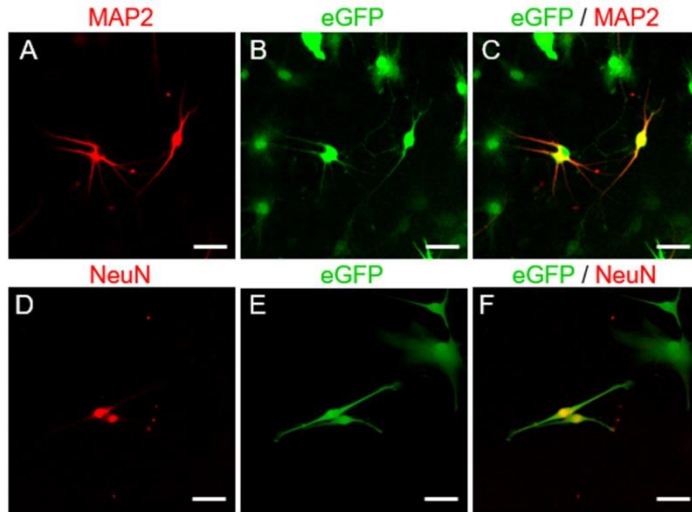

4

5 **Fig. S1.** Expression of the mature neuron-specific markers MAP2 (A-C), NeuN (D-F) in Raf-  
6 transduced eGFP+ cells. NSCs derived from rat embryonic cortices were plated at  $5 \times 10^3$  cells /cm<sup>2</sup>  
7 and transduced with bicistronic *ca-Raf-IRES-eGFP* ( $2 \times 10^{10}$ TU). The low density cultures were  
8 differentiated for 10 days and then immunostained against eGFP/MAP2 and eGFP/NeuN. Scale bar,  
9 30µm.

10

1 **Figure S2**

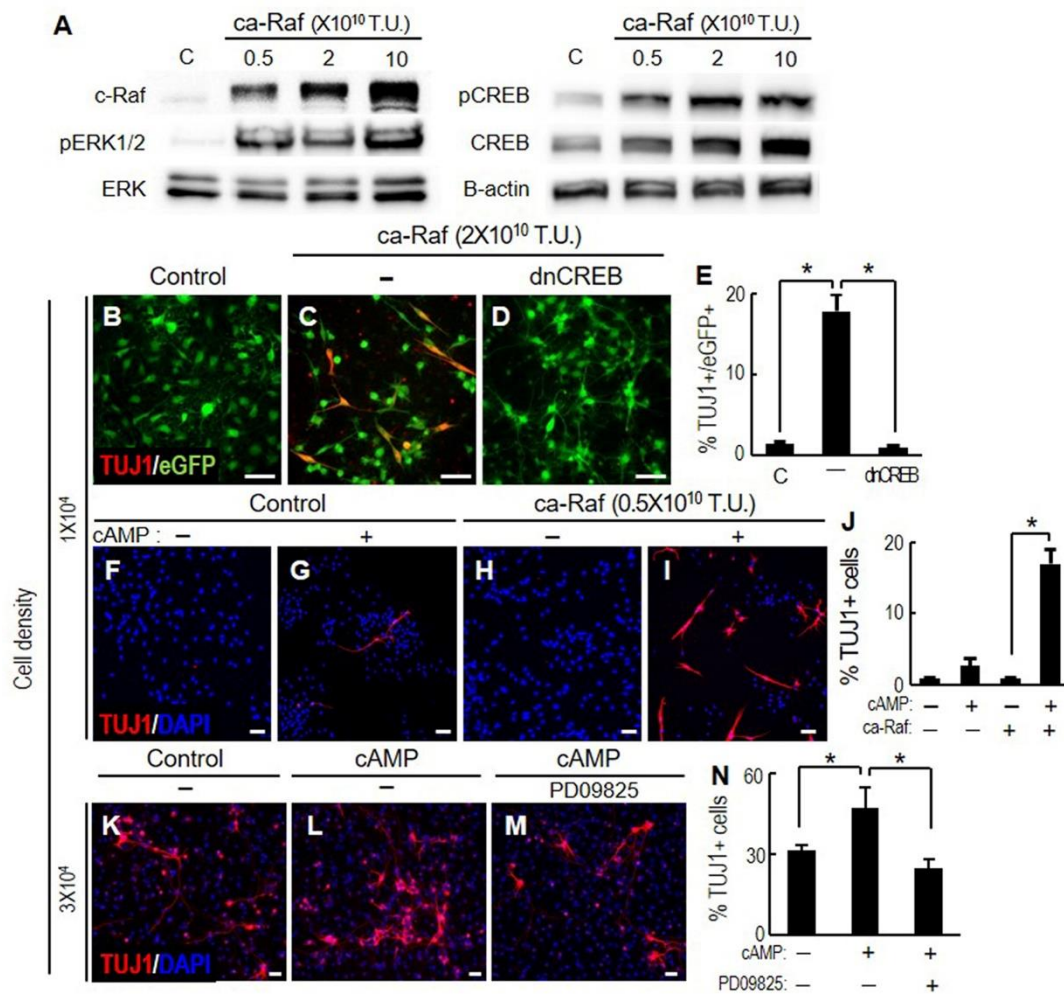

2

3 **Fig. S2.** CREB mediates neuronal differentiation induced by Raf-Erk activation. E14 cortical NSCs  
 4 were plated at 1x (B-J) or 3x10<sup>4</sup>/cm<sup>2</sup> (A and K-N), and transduced (or not) the following day.  
 5 Analyses were carried out 4-6 days after transduction. A, CREB activation estimated from  
 6 phosphorylated CREB (pCREB) protein levels obtained by WB analysis. B-E, CREB inhibition  
 7 abolishes neuronal differentiation induced by ca-Raf expression. TUJ1<sup>+</sup> neuronal yields were  
 8 estimated in cultures transduced with empty control (B), ca-Raf (C), and ca-Raf+ dominant negative  
 9 CREB (dn-CREB) (D). The transduced cells were labeled with *eGFP* using the bicistronic *-IRES-*  
 10 *eGFP* construct. F-J, cAMP treatment enhances ca-Raf-induced neuronal yields. K-N, cAMP-induced  
 11 neuron formation is abolished by the Erk inhibitor PD98059 (10μM). \**p*<0.005, n=3-5 cultures for  
 12 each group, one-way ANOVA. Scale bars, 50μm.

13

1 **Figure S3**

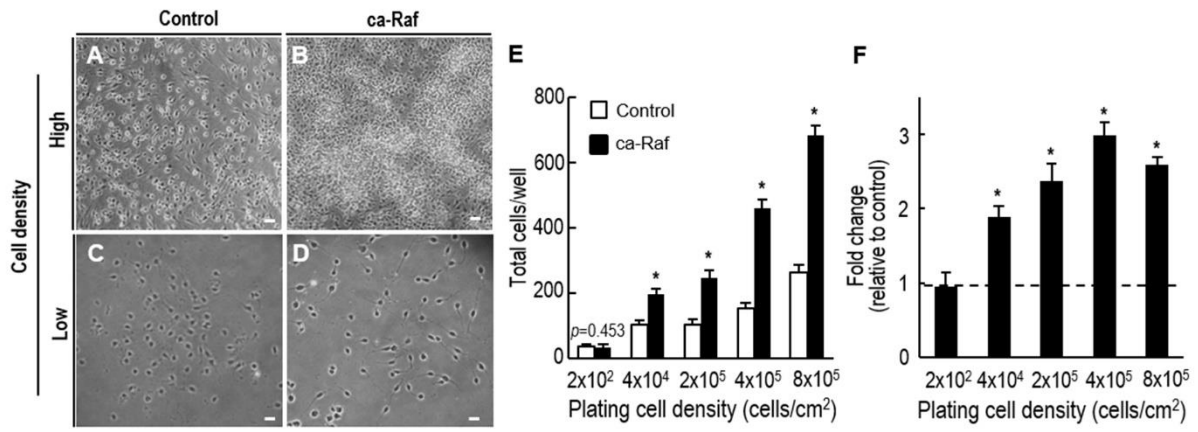

2

3 **Fig. S3.** Cell density-dependent effect of Raf-Erk activation on cell proliferation. Cortical NSCs were  
 4 plated at the cell densities indicated, and transduced with ca-Raf or mock control the following day.

5 The cultures were fixed and total viable cells were counted 4 days after transduction. A-D,

6 Representative phase contrast images 4 days after cell plating at 4x10<sup>5</sup> cells/cm<sup>2</sup> (high) and 2x10<sup>2</sup>

7 cells/cm<sup>2</sup> (low). E and F, The data are total cells/well (E) and % cell numbers relative to the respective

8 controls (F) at each cell density. \**p*<0.01, n=3 culture wells for each datum, one-way ANOVA. Scale

9 bars, 50μm.

10

1 **Figure S4**

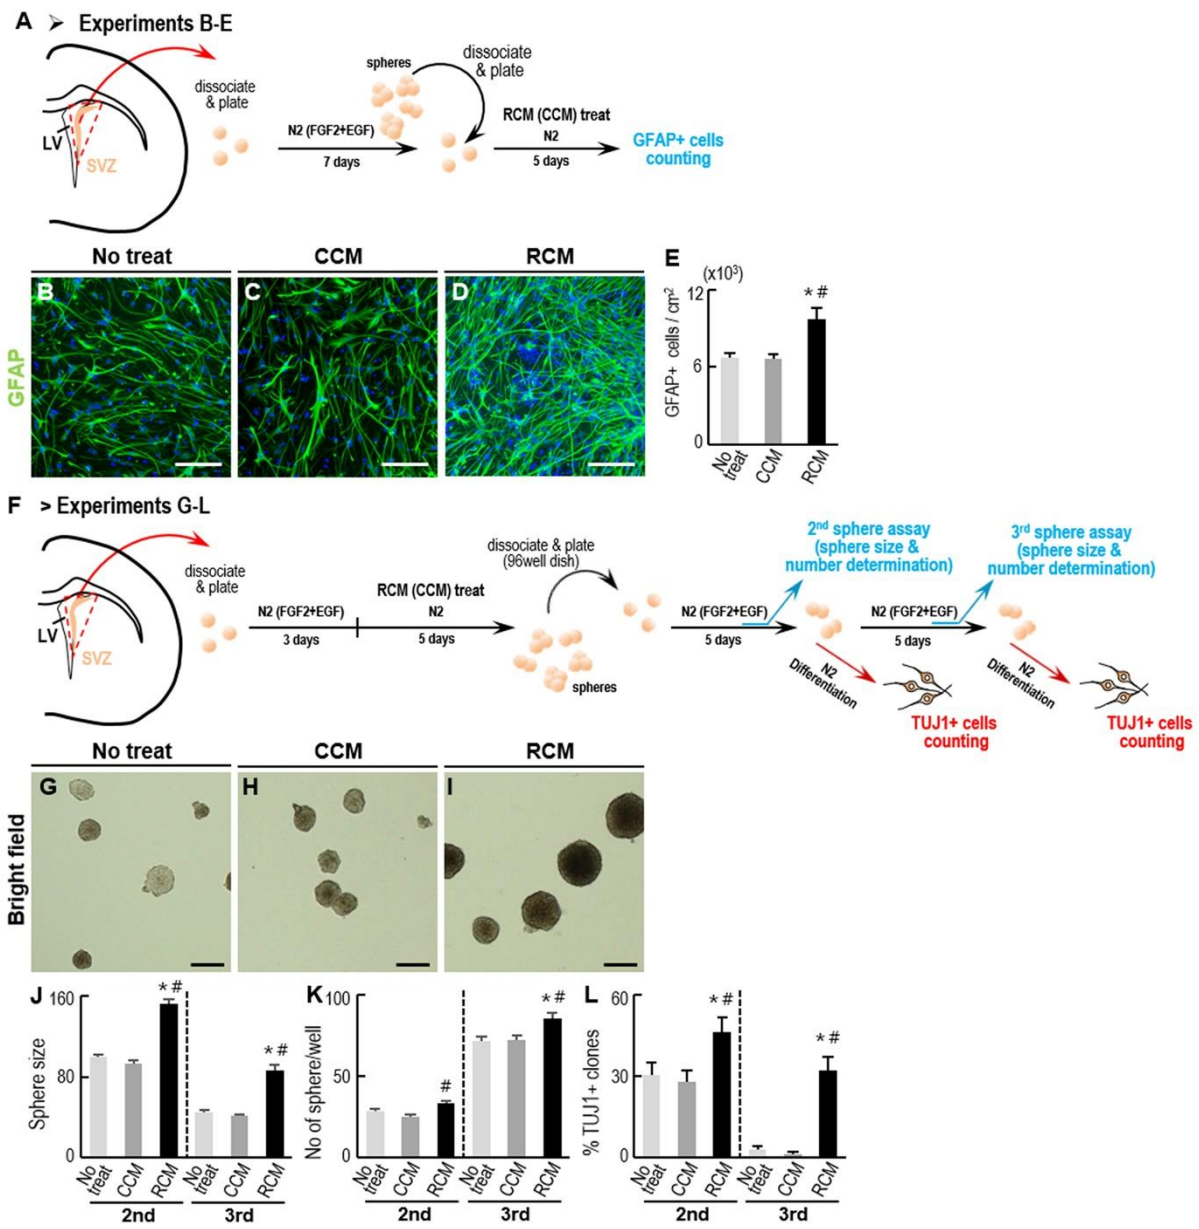

2

3 **Fig. S4.** The effect of RCM on adult brain-derived NSCs. A-E, RCM effect on GFAP+ adult NSC

4 number. A, schematic of the experimental procedure in B-E. Cells dissociated from the SVZs were

5 cultured in N2 supplemented with FGF2+EGF (20 ng/ml each) for 7 days. The spheres formed were

6 dissociated, plated on PLO/FN-coated dishes, and cultured in N2 medium in the presence of CM or

7 not. Five days later, GFAP+ cells were estimated (B-E). Significantly different from the untreated\*

8 and from the CCM-treated# at  $p < 0.001$ ,  $n = 3$  culture wells. F-L, Neurosphere-forming assays.

9 Schematic of the experimental procedure is shown in F. SVZ-derived neurospheres were treated with

10 CM for 5 days, then dissociated into single cells, and plated at 150 cells/well in 96-well plates. The

1 sizes and numbers of spheres (secondary) formed after 5 days were assessed (G-J). The secondary  
2 spheres were collected and subjected to tertiary sphere forming assays in the same way. The  
3 secondary and tertiary spheres were attached to PLO/FN-coated dishes and induced to differentiate in  
4 N2 medium. % TUJ1+ colonies were counted after 7 days (L). 120 spheres (J), 40 wells (K), 6 dishes  
5 (L) were analyzed. Significantly different from the untreated\* and from the CCM-treated# at  $p < 0.001$ ,  
6 one-way ANOVA. Scale bar, 100 $\mu$ m.

7

1 **Figure S5**

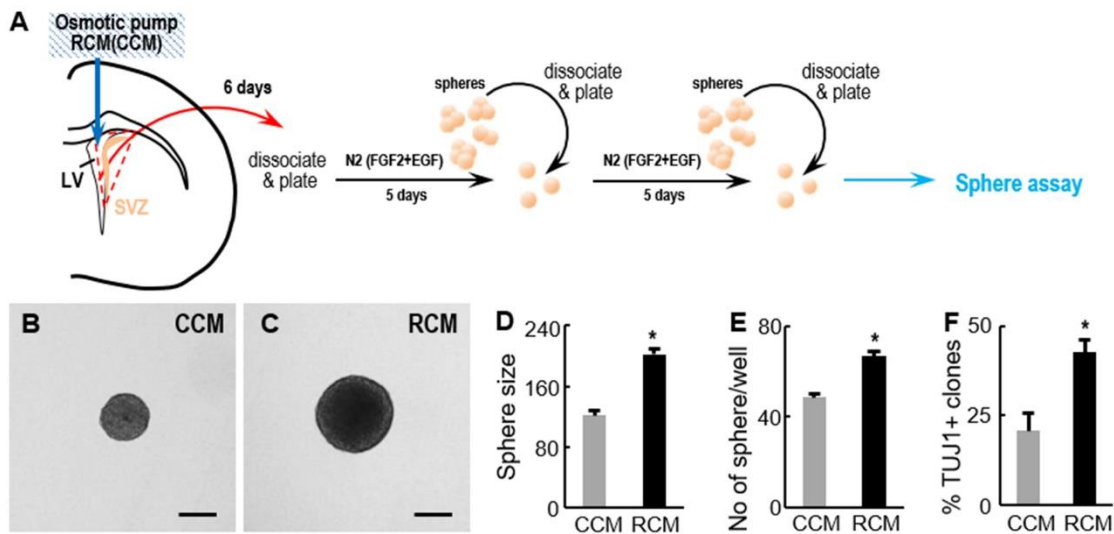

2

3 **Fig. S5.** Sphere forming assays using RCM (or CCM)-infused SVZs. A, RCM (or CCM) were infused

4 into the right LV of adult mice (without TBI) as described in Fig. 5A. Six days after infusion, the

5 ipsilateral SVZs were dissociated and cultured in FGF2 + EGF-supplemented N2 for 5 days. Spheres

6 formed were dissociated into single cells and neurosphere-forming assays were carried out as

7 described in Supplementary Fig. S4. B-F, Sizes (D) and numbers (E) of the spheres were assessed 5

8 days after plating on 96-well plates. Shown in B and C are representative spheres derived from CCM-

9 and RCM-infused SVZ tissues, respectively. The spheres were plated on PLO/FN-coated dishes and

10 induced to differentiate in N2 medium. TUJ1+ neuron-containing clones were counted 7 days after

11 differentiation (F). 40 spheres (D), 30-40 wells (E), and 200-300 clones (F) were analyzed per animal,

12 and the data are expressed as mean  $\pm$  SEM of 3 mice. \*Significantly different from CCM-infused

13 mice at  $p < 0.001$ , Student's t-test,  $n = 3$  mice for each RCM- and CCM-infused group. Scale bar,

14 200 $\mu$ m.

15



1 **Figure S6**

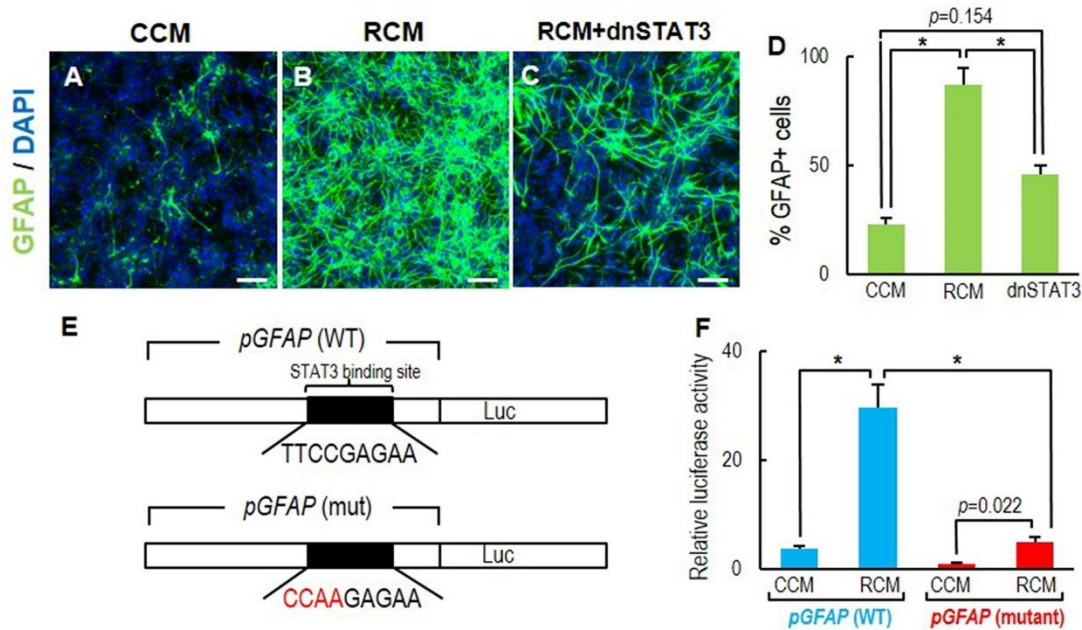

2  
3 **Fig. S6.** Jak-STAT signal activation is responsible for astrocytic differentiation induced by RCM  
4 treatment. A-D, Enhanced astrocyte yields in RCM-treated cultures are abolished by STAT signal  
5 inhibition using a dominant negative STAT3 (dn-STAT3). NSCs cultured from cortices of rat embryos  
6 (at E14) were transduced with retroviruses expressing dn-STAT3 (C) or mock vector (A, B). Two days  
7 after transduction, the NSCs were treated with CCM or RCM for 4 days. GFAP+ cells were counted 4  
8 days after CM treatment (D). \* $p < 0.001$ ,  $n = 3$  cultures, one way-ANOVA. scale bar, 50 $\mu$ m. E and F,  
9 *GFAP* promoter assay. Schematic drawing of the STAT binding sequences in the luciferase reporters  
10 driven by the wild-type (WT) and mutant (mut) *GFAP* promoters (*pGFAP*) (E). The cortical NSCs  
11 were transfected with the reporter vectors and luciferase activities were determined in (F). \* $p < 0.001$ ,  
12  $n = 4$  replicates, one way-ANOVA.

13



1 **Figure S7**

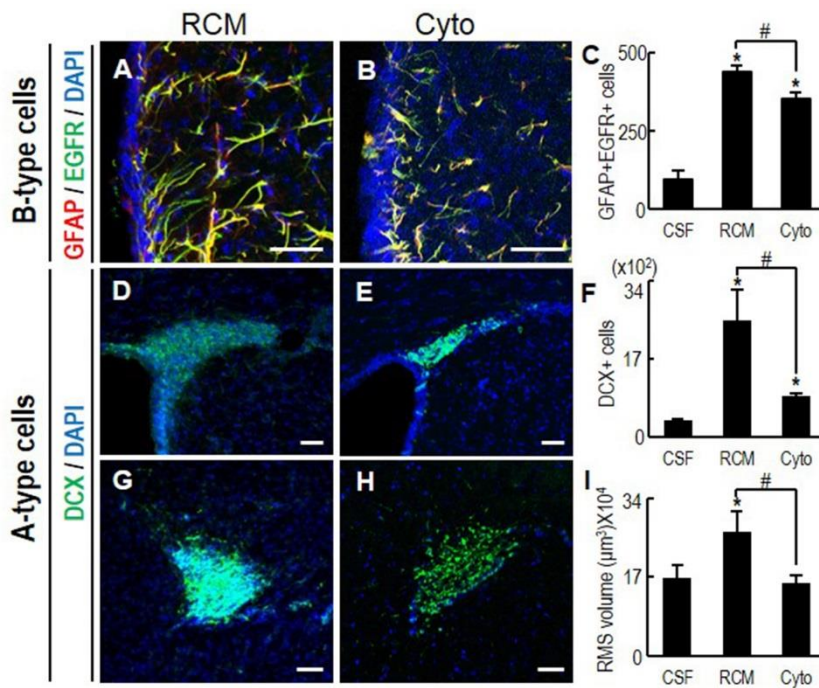

2

3 **Fig. S7.** Effect of the combined cytokines LIF+FGF2+VEGF on in vivo neurogenesis by SVZ-NSCs.

4 The levels of the cytokines LIF, FGF2, and VEGF were determined as described in Fig.7P and they  
 5 were infused as described in Fig.5A. Cell populations of activated B-type cells (GFAP/EGFR- double  
 6 positive, A-C) in the SVZ and A cells (DCX+) in the SVZ (D-F) and RMS (G-I) of the cytokine-  
 7 infused (Cyto) brains were compared with those of the mice infused with CSF (control) and RCM.  
 8 Significantly different from the CSF-infused control\* and from the RCM-infused# at  $p < 0.005$ , one-  
 9 way ANOVA,  $n = 4$  (CSF), 7 (RCM), and 4 (Cyto). Scale bar, 50µm.

10

1 **Figure S8**

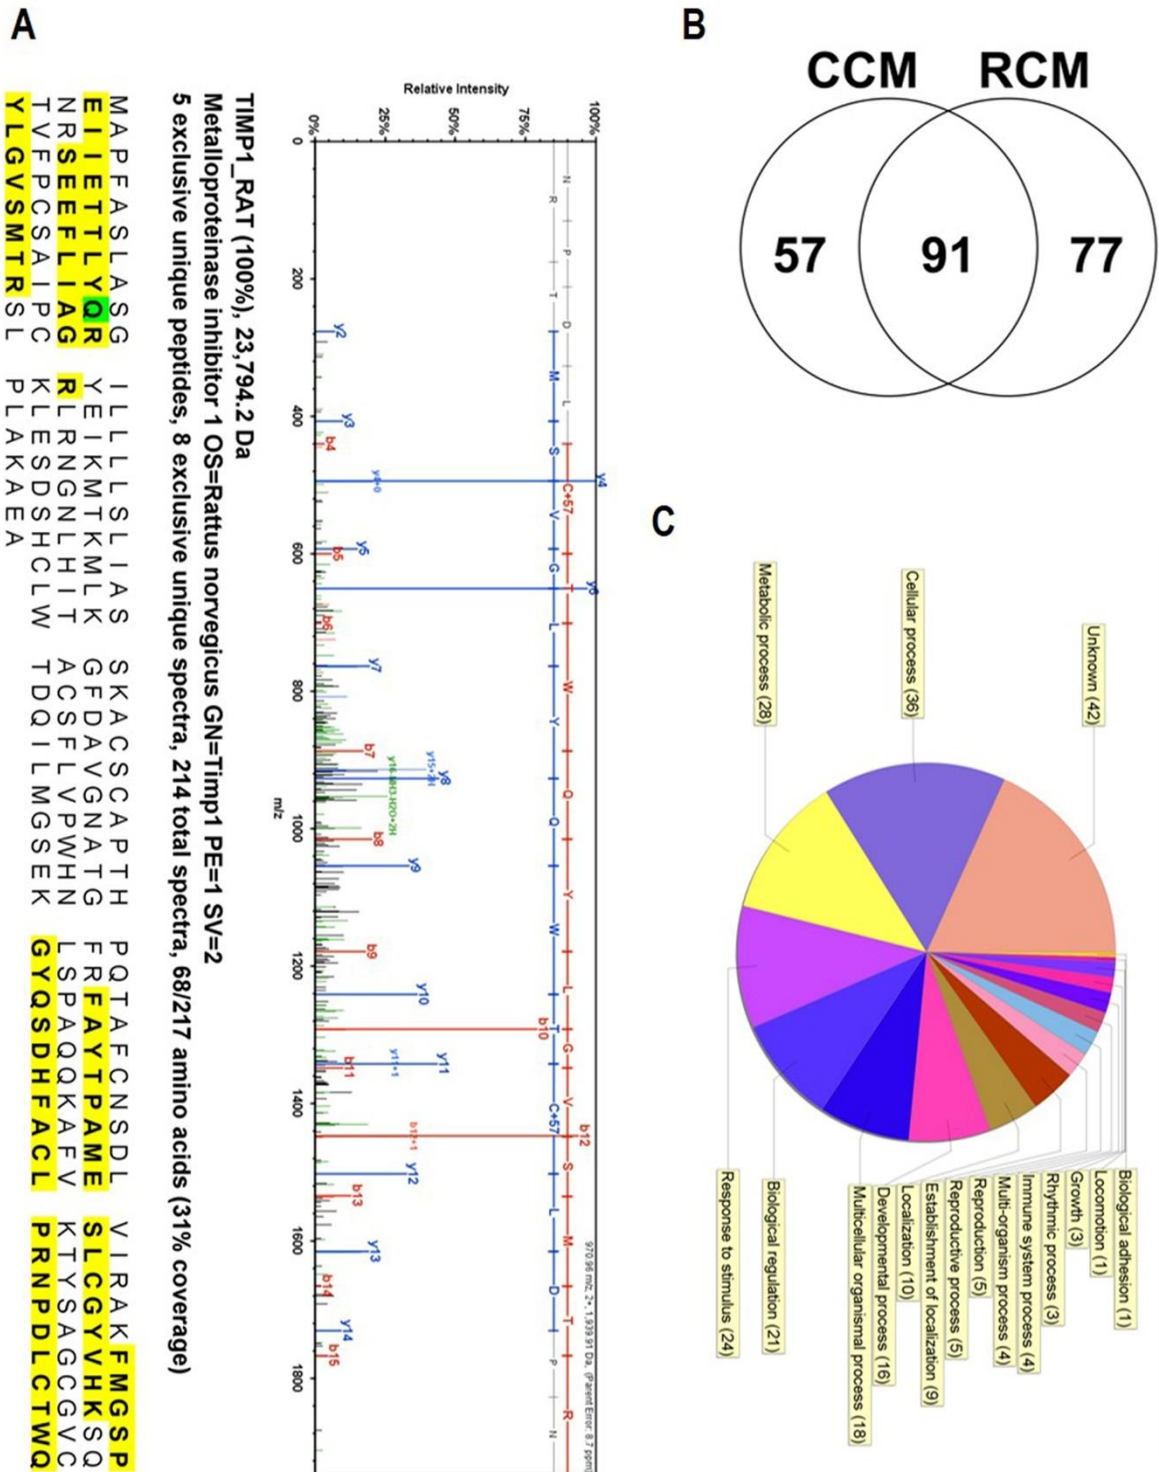

2  
 3 **Fig. S8.** Identification of proteins in CM by LC-MS/MS. Proteins (100µg) in RCM and CCM were  
 4 separated by 12% SDS-PAGE and stained with Coomassie Brilliant Blue. The stained proteins were  
 5 cut into 20 pieces for in-gel trypsin digestion and analyzed. A, Representative LC/MS spectrum of the  
 6 metalloproteinase inhibitor 1 (TIMP1) identified in RCM. B, Band-diagram exhibiting numbers of the

1 proteins detected in RCM and CCM. A total 225 proteins were identified, of which 57 and 77 proteins  
2 were detected only in the CCM and RCM, respectively, and 91 proteins were detected in both the  
3 CCM and RCM. C, Ontologic analysis of the 77 proteins present only in RCM and 6 proteins that  
4 were >5 fold higher in RCM than CCM (listed in Table S2). The proteins are classified according to  
5 the gene ontology term: "Biological process".

6

1 **Figure S9**

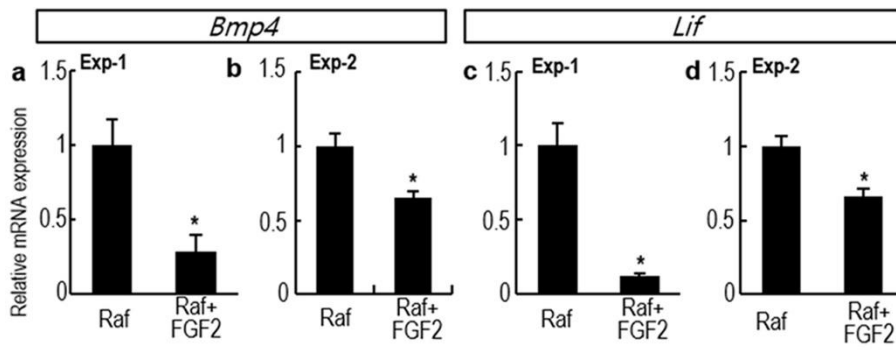

2

3 **Fig. S9.** Real-time PCR analysis of *Bmp4* and *Lif* mRNA expression in ca-Raf-transduced NSC

4 cultures in the presence or absence of FGF2 (10 ng/ml). \*Significant at  $p < 0.01$ ,  $n = 3$  PCR reactions for

5 each datum, Student's t-test.

6

1 Table. S1. Primers for PCR analyses, Related to Figure 4.

2

| <b>Gene symbol</b> | <b>Sequence</b>                   |
|--------------------|-----------------------------------|
| <i>Aqp4</i>        | F: TTG CTT TGG ACT CAG CAT TG     |
|                    | R: GGG AGG TGT GAC CAG GTA GA     |
| <i>Bmp2</i>        | F: TGA GGC TGC TCA CCA TGT TTG    |
|                    | R: GTG ACA TCA AAG CTC TCC CAC T  |
| <i>Bmp4</i>        | F: ATT GGC TCC CAA CTT CTT CCT TT |
|                    | R: CGT GAT GGA AAC TCC TCA CAG T  |
| <i>Bmp7</i>        | F: CGC TCC AAG ACT CCA AAG AAC C  |
|                    | R: CGG TGT CTG GGT TGATGA AGT G   |
| <i>Egfr</i>        | F: ACC GTG GAG AGA ATC CCT TT     |
|                    | R: TTG TTG CTA AAT CGC ACA GC     |
| <i>Fabp7</i>       | F: CCA GCT GGG AGA AGA GTT TG     |
|                    | R: TAA CAG CGA ACA GCA ACG AC     |
| <i>Fgf1</i>        | F: CGC AGA CAC CAA ATG AAG AA     |
|                    | R: TTT CTG GCC GTA GTG AGT CC     |
| <i>Fgf2</i>        | F: GAA CCG GTA CCT GGC TAT GA     |
|                    | R: CCG TTT TGG ATC CGA GTT TA     |
| <i>Gapdh</i>       | F: GGC ATT GCT CTC ATT GAC AA     |
|                    | R: AGG GCC TCT CTC TTG CTC TC     |
| <i>Gfap</i>        | F: GCA GAC CTC ACA GAC GTT GCT    |
|                    | R: AGG CTG GTT TCT CGG ATC TGG    |
| <i>Slc1a3</i>      | F: GGA TGG AAA GA TTC CAG CAA     |
|                    | R: ACC TCC CGG TAG CTC ATT TT     |
| <i>Glt1</i>        | F: CCA AAA GCA ACG GAG AAG AG     |
|                    | R: ACC TCC CGG TAG CTC ATT TT     |
| <i>Lif</i>         | F: GGC AAC CTC ATG AAC CAG AT     |
|                    | R: ACC ATC CGA TAC AGC TCG AC     |
| <i>Nestin</i>      | F: GGA GTG TCG CTT AGA GGT        |
|                    | R: TCC AGA AAG CCA AGA GAA        |
| <i>Notch</i>       | F: GGT GCG AGC GCA GTG AAG GA     |
|                    | R: CCC GCT GCT GCC CTC TTT CC     |
| <i>Sox2</i>        | F: TCA CAA CAA TCG CGG CGG CCC    |
|                    | R: GCG CGG AGA TCT GGC GGA GAA T  |
| <i>Pax6</i>        | F: TGT CCA ACG GAT GTG TGA GT     |
|                    | R: TTT CCC AAG CAA AGA TGG AC     |
| <i>Vegf</i>        | F: GTG CAC TGG ACC CTG GCT TTA CT |
|                    | R: CGC CTT GCA ACG CGA A          |
| <i>Vimentin</i>    | F: AGA TCG ATG TGG ACG TTT CC     |
|                    | R: CAC ACT GTC TCC GGT ATT CGT    |

3

4

1 Table. S2. Proteins abundantly detected in the RCM, Related to Figure S8.

2

| #  | Identified Proteins                                                     | Accession Number   | Fold change by sample | Normalized Spectral counts |     |
|----|-------------------------------------------------------------------------|--------------------|-----------------------|----------------------------|-----|
|    |                                                                         |                    |                       | CCM                        | RCM |
| 1  | Vimentin OS                                                             | G3V8C3_RAT (+1)    | RCM only              |                            | 125 |
| 2  | Metalloproteinase inhibitor 1                                           | TIMP1_RAT          | RCM only              |                            | 160 |
| 3  | Alpha-2-macroglobulin                                                   | A2MG_RAT           | RCM only              |                            | 114 |
| 4  | Moesin                                                                  | A0A096MK30_RAT(+1) | RCM only              |                            | 51  |
| 5  | Peptidyl-prolyl cis-trans isomerase                                     | Q6AYQ9_RAT         | RCM only              |                            | 93  |
| 6  | Sulfated glycoprotein 1                                                 | F7EPE0_RAT (+1)    | RCM only              |                            | 49  |
| 7  | Mannan-binding lectin serine protease 1                                 | MASP1_RAT          | RCM only              |                            | 56  |
| 8  | Carbonic anhydrase 2                                                    | CAH2_RAT           | RCM only              |                            | 65  |
| 9  | Uncharacterized protein                                                 | D3ZJE2_RAT (+1)    | RCM only              |                            | 57  |
| 10 | Gelsolin                                                                | GELS_RAT           | RCM only              |                            | 37  |
| 11 | Myosin-6                                                                | MYH6_RAT           | RCM only              |                            | 1   |
| 12 | Histone H3                                                              | D3ZJ08_RAT (+6)    | RCM only              |                            | 13  |
| 13 | Uncharacterized protein (Fragment)                                      | F1M9P7_RAT (+1)    | RCM only              |                            | 43  |
| 14 | Chloride intracellular channel protein 1                                | CLIC1_RAT          | RCM only              |                            | 47  |
| 15 | Heat shock protein HSP 90-alpha                                         | HS90A_RAT          | RCM only              |                            | 43  |
| 16 | Nucleolin                                                               | NUCL_RAT (+1)      | RCM only              |                            | 19  |
| 17 | Latexin                                                                 | LXN_RAT            | RCM only              |                            | 16  |
| 18 | Elongation factor 1-gamma                                               | EF1G_RAT           | RCM only              |                            | 13  |
| 19 | Heterogeneous nuclear ribonucleoprotein K                               | HNRPK_RAT (+2)     | RCM only              |                            | 14  |
| 20 | Coactosin-like protein                                                  | COTL1_RAT          | RCM only              |                            | 6   |
| 21 | Insulin-like growth factor-binding protein 3                            | IBP3_RAT           | RCM only              |                            | 21  |
| 22 | Dextrin                                                                 | DEST_RAT           | RCM only              |                            | 78  |
| 23 | Amyloid beta A4 protein                                                 | A4_RAT             | RCM only              |                            | 6   |
| 24 | Eukaryotic translation initiation factor 5A2 (Predicted)                | G3V7J7_RAT (+1)    | RCM only              |                            | 4   |
| 25 | Elongation factor 1-alpha 1                                             | EF1A1_RAT          | RCM only              |                            | 17  |
| 26 | Glutathione S-transferase alpha-4                                       | GSTA4_RAT          | RCM only              |                            | 5   |
| 27 | Proteasome subunit beta type                                            | G3V8U9_RAT (+1)    | RCM only              |                            | 10  |
| 28 | Proteasome subunit beta type-2                                          | PSB2_RAT           | RCM only              |                            | 2   |
| 29 | 60S acidic ribosomal protein P0                                         | RLA0_RAT           | RCM only              |                            | 25  |
| 30 | Ubiquitin-conjugating enzyme E2 N                                       | UBE2N_RAT          | RCM only              |                            | 12  |
| 31 | Poly(RC) binding protein 2                                              | Q6AYU5_RAT         | RCM only              |                            | 25  |
| 32 | Pyruvate kinase PKM                                                     | KPYM_RAT           | RCM only              |                            | 18  |
| 33 | Protein LOC100362142                                                    | D3ZFY8_RAT         | RCM only              |                            | 25  |
| 34 | Protein Snrpd3                                                          | M0R907_RAT         | RCM only              |                            | 4   |
| 35 | Prothymosin alpha                                                       | PTMA_RAT           | RCM only              |                            | 19  |
| 36 | Actin related protein 2/3 complex, subunit 4 (Predicted), isoform CRA_a | B2RZ72_RAT         | RCM only              |                            | 13  |
| 37 | Carbonyl reductase [NADPH] 1                                            | CBR1_RAT (+1)      | RCM only              |                            | 7   |
| 38 | Thioredoxin (Fragment)                                                  | R4GNK3_RAT (+1)    | RCM only              |                            | 9   |

|    |                                                                  |                 |          |    |
|----|------------------------------------------------------------------|-----------------|----------|----|
| 39 | 14-3-3 protein eta                                               | I433F_RAT       | RCM only | 90 |
| 40 | Adenylate kinase 2                                               | KAD2_RAT        | RCM only | 13 |
| 41 | Heterogeneous nuclear ribonucleoprotein F                        | HNRPF_RAT       | RCM only | 16 |
| 42 | Prostaglandin E synthase 3 (Fragment)                            | R9PXR7_RAT (+1) | RCM only | 5  |
| 43 | Protein Eea1 (Fragment)                                          | F1LUA1_RAT      | RCM only | 1  |
| 44 | Protein LOC100910754                                             | D4A0F5_RAT (+2) | RCM only | 2  |
| 45 | Plastin 3 (T-isoform), isoform CRA_a                             | F1LPK7_RAT (+1) | RCM only | 12 |
| 46 | Protein Hectd4 (Fragment)                                        | F1LZX5_RAT      | RCM only | 4  |
| 47 | NudC domain-containing protein 2                                 | NUDC2_RAT (+1)  | RCM only | 7  |
| 48 | Protein Dag1                                                     | F1M8K0_RAT      | RCM only | 4  |
| 49 | Protein Tln1                                                     | G3V852_RAT      | RCM only | 1  |
| 50 | RCG50226, isoform CRA_a                                          | G3V8P4_RAT      | RCM only | 4  |
| 51 | Actin-related protein 2/3 complex subunit 3                      | B2GV73_RAT      | RCM only | 7  |
| 52 | 6-phosphogluconolactonase                                        | 6PGL_RAT (+1)   | RCM only | 8  |
| 53 | Proteasome subunit beta type                                     | F1LNN1_RAT (+1) | RCM only | 2  |
| 54 | Clathrin heavy chain 1                                           | CLH1_RAT (+1)   | RCM only | 1  |
| 55 | Cullin-associated NEDD8-dissociated protein 1                    | CAND1_RAT       | RCM only | 4  |
| 56 | Keratin, type II cytoskeletal 1                                  | K2C1_RAT        | RCM only | 7  |
| 57 | Protein Sh3bgrl3                                                 | B2RZ27_RAT      | RCM only | 2  |
| 58 | Protein Ppp2r1a                                                  | Q5XI34_RAT      | RCM only | 1  |
| 59 | Heterogeneous nuclear ribonucleoprotein C                        | G3V9R8_RAT      | RCM only | 10 |
| 60 | Alpha-actinin-4                                                  | ACTN4_RAT       | RCM only | 2  |
| 61 | Peptidyl-prolyl cis-trans isomerase D                            | PPID_RAT        | RCM only | 8  |
| 62 | UMP-CMP kinase                                                   | KCY_RAT         | RCM only | 1  |
| 63 | Uncharacterized protein (Fragment)                               | F1LYE1_RAT      | RCM only | 1  |
| 64 | 72 kDa type IV collagenase                                       | E9PSM5_RAT (+1) | RCM only | 7  |
| 65 | Protein LOC102547754                                             | D4ADL2_RAT      | RCM only | 2  |
| 66 | Thimet oligopeptidase                                            | THOP1_RAT       | RCM only | 2  |
| 67 | Protein LOC100360057 (Fragment)                                  | F7FLF2_RAT (+1) | RCM only | 4  |
| 68 | Importin subunit beta-1                                          | F2Z3Q8_RAT (+1) | RCM only | 4  |
| 69 | Nidogen-1                                                        | F1LM84_RAT      | RCM only | 2  |
| 70 | Clusterin                                                        | CLUS_RAT (+1)   | RCM only | 4  |
| 71 | Serine/threonine-protein phosphatase PP1-alpha catalytic subunit | PP1A_RAT        | RCM only | 2  |
| 72 | Protein Chd4                                                     | E9PU01_RAT      | RCM only | 1  |
| 73 | Heterogeneous nuclear ribonucleoprotein D, isoform CRA_b         | G3V6A4_RAT (+3) | RCM only | 2  |
| 74 | Glutathione S-transferase omega-1                                | GSTO1_RAT (+1)  | RCM only | 2  |
| 75 | Ubiquitin-conjugating enzyme E2 variant 2                        | UB2V2_RAT       | RCM only | 3  |
| 76 | Protein Sorcs1                                                   | F1LUZ4_RAT      | RCM only | 1  |



|           |                                              |                 |          |    |     |
|-----------|----------------------------------------------|-----------------|----------|----|-----|
| <b>77</b> | Protein LOC100362339                         | D4A6G6_RAT (+1) | RCM only |    | 1   |
| <b>78</b> | Carboxypeptidase E                           | CBPE_RAT        | 9.1      | 20 | 179 |
| <b>79</b> | Glia-derived nexin                           | G3V7Z4_RAT      | 8.6      | 55 | 469 |
| <b>80</b> | SPARC-like 1 (Mast9, hevin), isoform CRA_a   | G3V7X5_RAT (+1) | 7.2      | 64 | 457 |
| <b>81</b> | Transketolase                                | G3V826_RAT (+1) | 6.9      | 9  | 63  |
| <b>82</b> | Insulin-like growth factor-binding protein 2 | IBP2_RAT        | 6.5      | 41 | 264 |
| <b>83</b> | Heat shock cognate 71 kDa protein            | HSP7C_RAT       | 6.4      | 21 | 136 |

1

2
